# Supplementary material for: Flexible and free-standing hetero-electrocatalyst of high-valence-cation doped MoS2/MoO2/CNT foam with synergistically enhanced hydrogen evolution reaction catalytic activity
Source: Royal Society of Chemistry journal article supplement (doi:10.1039/d0ta02538k), 2020-01-01
Supplement: d0ta02538k1.pdf [file d0ta02538k1.pdf]

## Supporting Information for

### **Flexible and Free-Standing Hetero-electrocatalyst of High-Valence-Cation Doped MoS<sub>2</sub>/MoO<sub>2</sub>/CNT Foam with Synergistically Enhanced Hydrogen Evolution Reaction Catalytic Activity**

*Chenyu Li, †<sup>a</sup> Shuyang Zhao, †<sup>b</sup> Kunlei Zhu,<sup>c</sup> Bolun Wang,<sup>a</sup> Enze Wang,<sup>a</sup> Yufeng Luo,<sup>d</sup> Liqiong He,<sup>a</sup> Jiaping Wang,<sup>d</sup> Kaili Jiang,<sup>d</sup> Shoushan Fan,<sup>d</sup> Jia Li,<sup>\*b</sup> and Kai Liu<sup>\*a</sup>*

<sup>a</sup> State Key Laboratory of New Ceramics and Fine Processing, School of Materials Science and Engineering, *Tsinghua* University, Beijing 100084, P. R. China.

<sup>b</sup> Shenzhen Geim Graphene Center, Tsinghua Shenzhen International Graduate School, Tsinghua University, Shenzhen 518055, P. R. China.

<sup>c</sup> College of Chemistry and Chemical Engineering, Qufu Normal University, Qufu 273165, P. R. China.

<sup>d</sup> Department of Physics and Tsinghua-Foxconn Nanotechnology Research Center, Tsinghua University, Beijing 100084, P. R. China.

† These authors contributed equally to this work.

\* Corresponding Authors. E-mails: liuk@tsinghua.edu.cn (K.L.); li.jia@sz.tsinghua.edu.cn (J.L.).

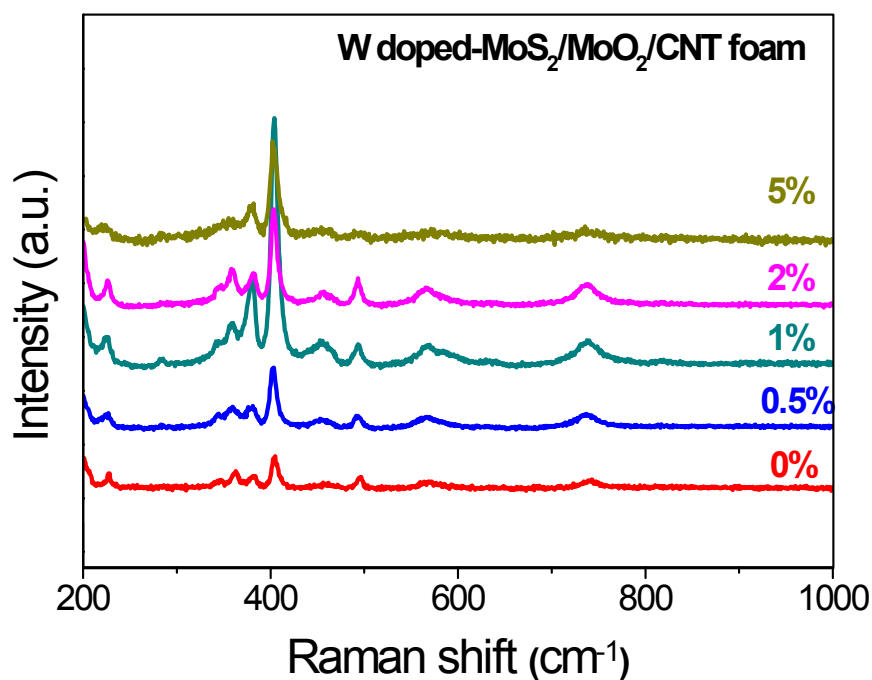

**Fig. S1** Raman scan curve at different doping concentrations. As shown in the figure, the peak position and number of peaks hardly change with the change of doping concentration.

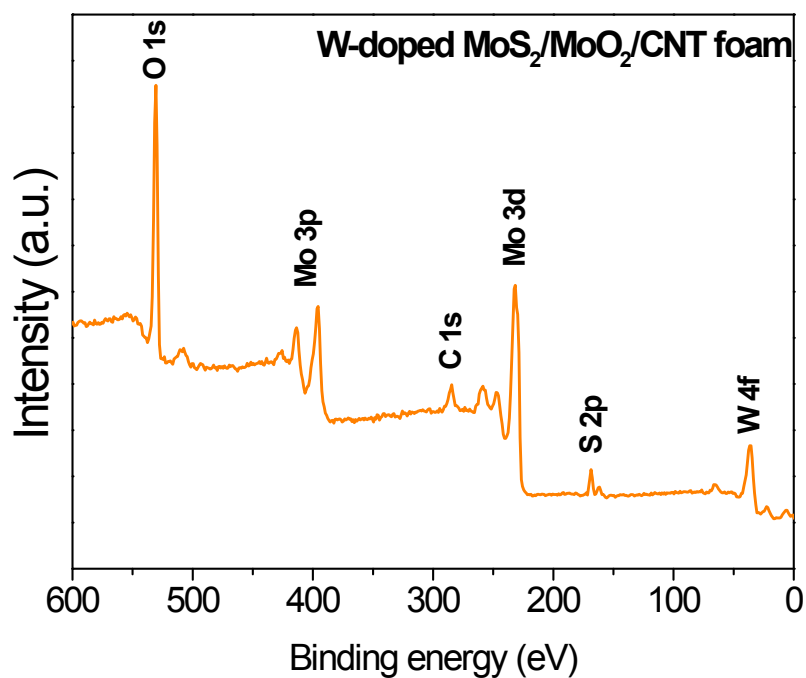

**Fig. S2** X-ray photoelectron spectroscopy (XPS) of W-doped MoS<sub>2</sub>/MoO<sub>2</sub>/CNT foam.

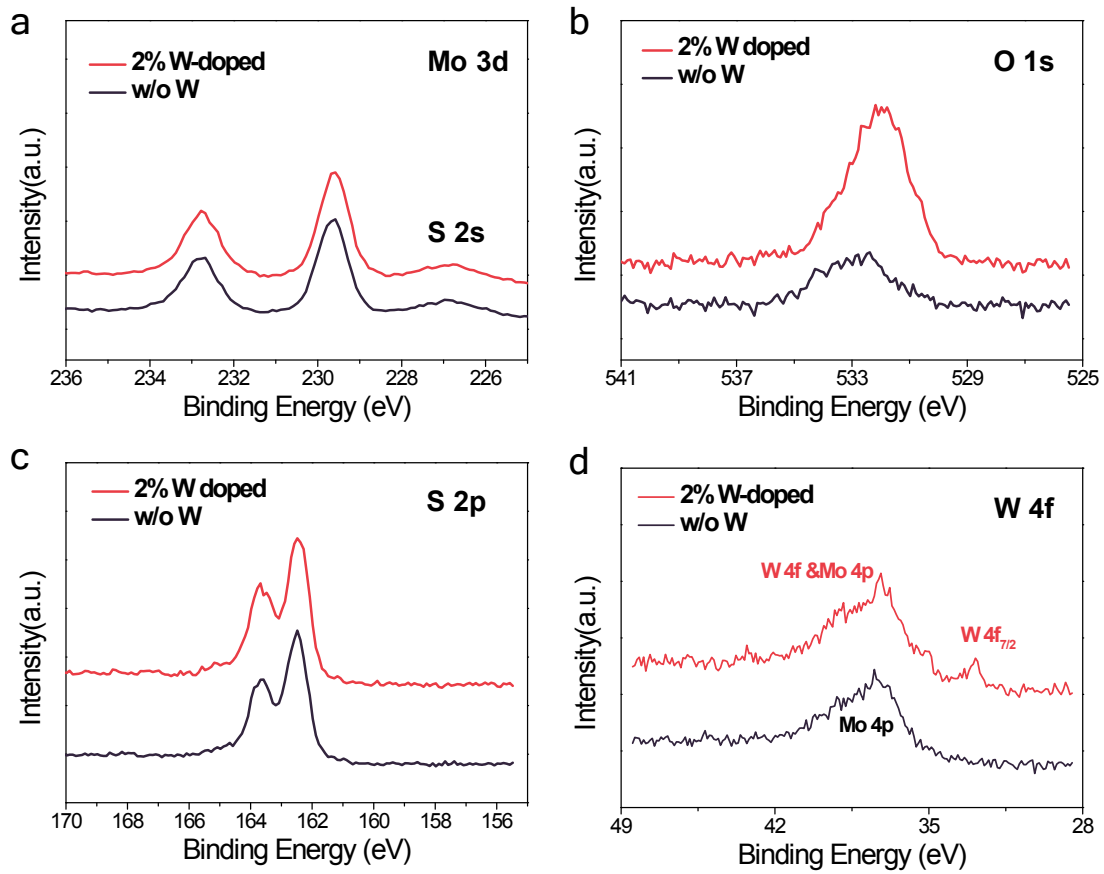

**Fig. S3** X-ray photoelectron spectroscopy (XPS) of a) Mo 3d, b) O 1s, c) S 2p and W 4f in 2% W-doped MoS<sub>2</sub>/MoO<sub>2</sub>/CNT foam and non-doped MoS<sub>2</sub>/MoO<sub>2</sub>/CNT foam.

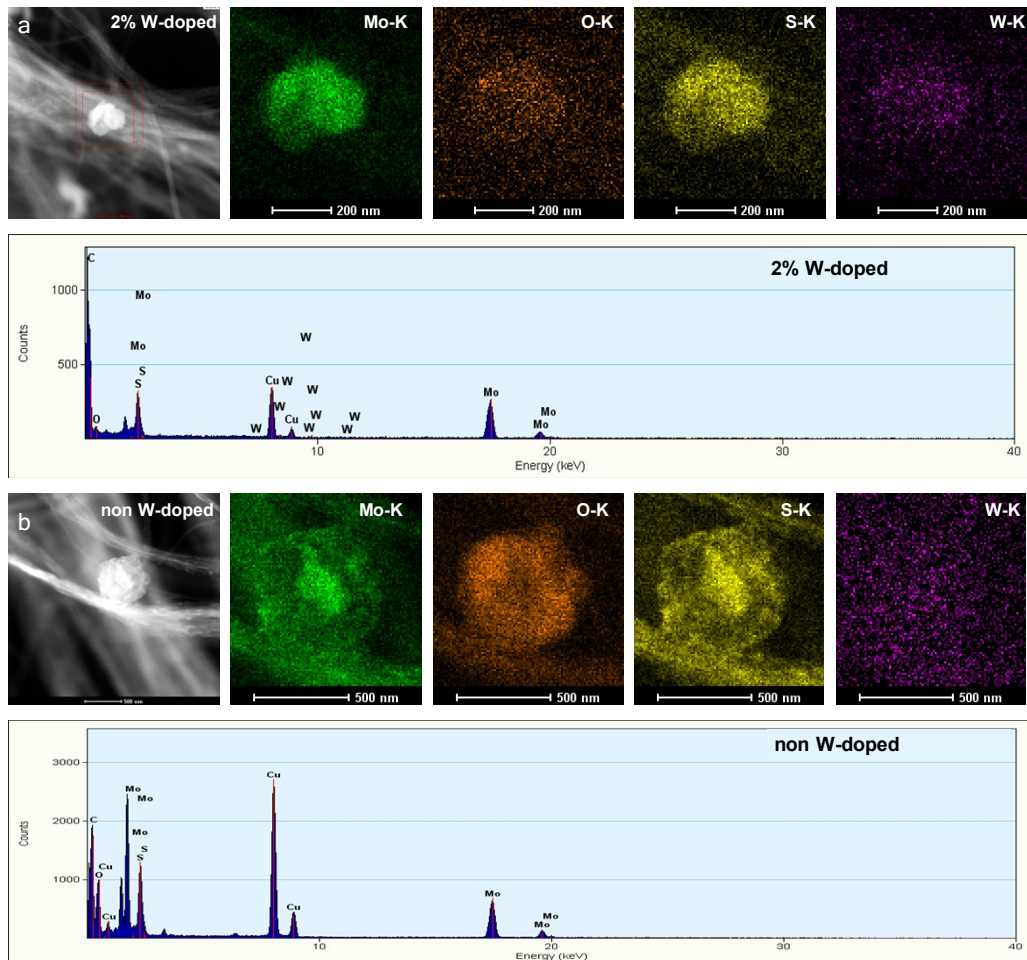

**Fig. S4** Energy-dispersive spectroscopy (EDS) elemental mapping of Mo, O, S and W in 2% W-doped MoS<sub>2</sub>/MoO<sub>2</sub>/CNT foam and non-doped MoS<sub>2</sub>/MoO<sub>2</sub>/CNT foam.

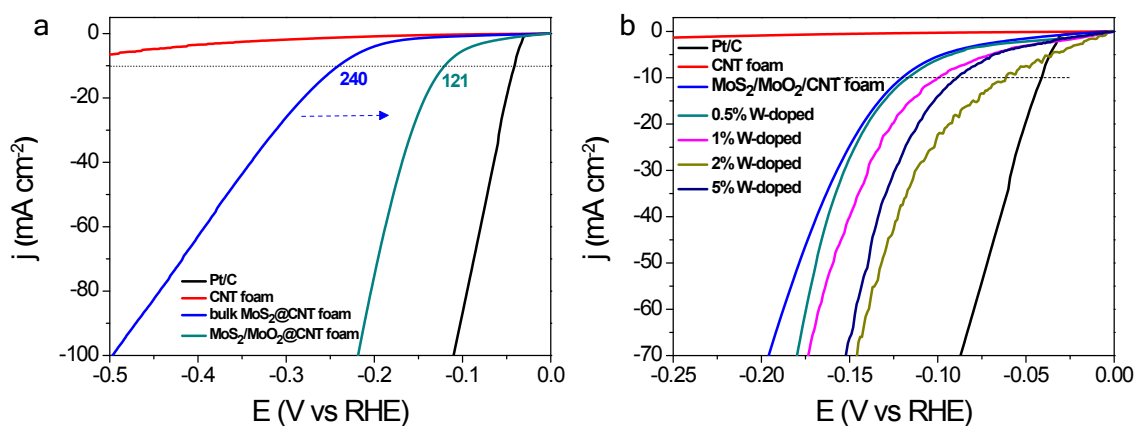

**Fig. S5** Electrochemical properties of W-doped MoS<sub>2</sub>/MoO<sub>2</sub>/CNT foam. a) Comparison of bulk MoS<sub>2</sub>/CNT foam and MoS<sub>2</sub>/MoO<sub>2</sub>/CNT foam prepared by our experimental method,

proving that our method method is effective. b) Performance obtained by doping different concentrations of W atoms, best performance at 2%.

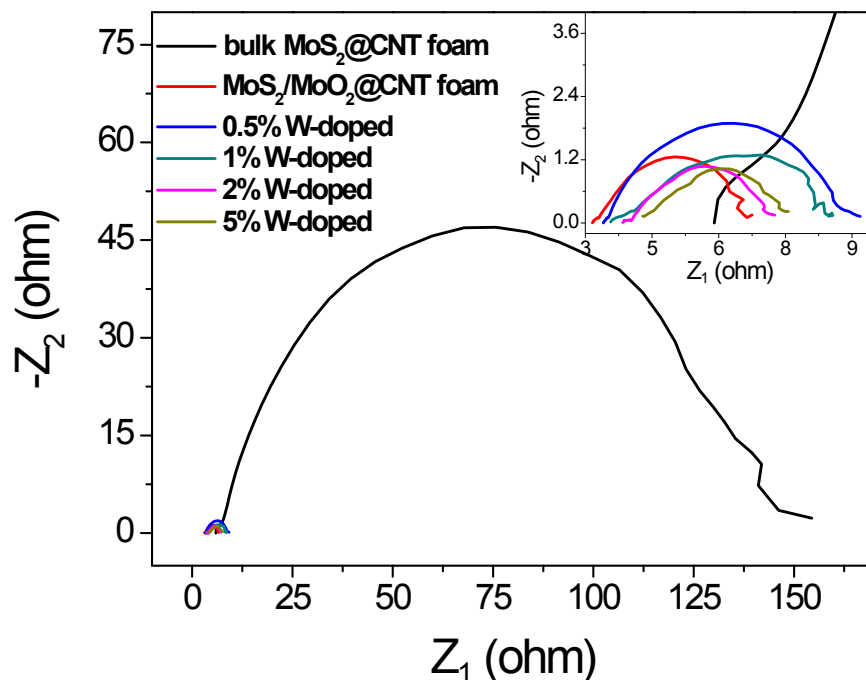

**Fig. S6** Electrochemical impedance spectroscopy (EIS) data of samples under different conditions. Because the surface area is different, the absolute values cannot be compared, but it can be seen that the charge transfer impedance of the sample obtained by our method is very small.

**Table S1.** XPS determined Mo, W, S, C and O atoms amounts in 2%W-doped sample.

| Name         | Start BE | Peak BE | End BE | Atomic % | PP At. % |
|--------------|----------|---------|--------|----------|----------|
| <b>W 4f</b>  | 47.78    | 37.18   | 30.68  | 0.24     | 0.12     |
| <b>S 2p</b>  | 171.98   | 162.45  | 159.48 | 3.84     | 2.61     |
| <b>Mo 3d</b> | 238.88   | 229.59  | 224.18 | 1.99     | 1.09     |
| <b>C 1s</b>  | 295.38   | 284.81  | 282.18 | 88.21    | 93.78    |
| <b>O 1s</b>  | 540.18   | 532     | 527.68 | 5.72     | 2.4      |

**Table S2.** EDS determined C, O, S, Cu, Mo and W atoms amounts in 2%W-doped sample.

| Element      | Weight % | Atomic % |
|--------------|----------|----------|
| <b>C(K)</b>  | 33.35    | 75.83    |
| <b>O(K)</b>  | 1.38     | 2.35     |
| <b>S(K)</b>  | 1.80     | 1.53     |
| <b>Cu(K)</b> | 15.33    | 6.58     |

|              |       |       |
|--------------|-------|-------|
| <b>Mo(K)</b> | 47.99 | 13.66 |
| <b>W(L)</b>  | 0.14  | 0.02  |

**Table S3.** ICP determined Mo, W, S and O atoms amounts in 2%W-doped sample.

| Sample    | Mo(at.%) | W(at.%) | S(at.%) | O(at.%) | Mo/W |
|-----------|----------|---------|---------|---------|------|
| 2%W-doped | 33.17    | 0.48    | 4.90    | 61.44   | 69.1 |

**Table S4.** Formation energies of W atom substituted Mo atom at edge and basal plane of MoS<sub>2</sub> under the S-rich or Mo-rich condition.

|                      | W <sub>Mo</sub> doping Structure                                                    | Formation energy of W <sub>Mo</sub> doping (eV) |
|----------------------|-------------------------------------------------------------------------------------|-------------------------------------------------|
| edge                 |                                                                                     |                                                 |
| W <sub>edge-Mo</sub> | 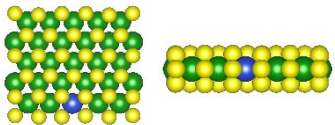   | -2.94 (S-rich)<br>-0.30 (Mo-rich)               |
| W <sub>edge-1</sub>  |   | -2.74 (S-rich)<br>-0.10 (Mo-rich)               |
| W <sub>edge-2</sub>  |  | -2.76 (S-rich)<br>-0.12 (Mo-rich)               |
| W <sub>edge-3</sub>  |  | -2.74 (S-rich)<br>-0.10 (Mo-rich)               |
| W <sub>edge-S</sub>  |  | -2.95 (S-rich)<br>-0.31 (Mo-rich)               |
| basal plane          |                                                                                     |                                                 |
| W <sub>plane</sub>   |  | -2.35 (S-rich)<br>0.29 (Mo-rich)                |
